# Supplementary material for: Lignin valorization for protocatechuic acid production in engineered Saccharomyces cerevisiae
Source: Royal Society of Chemistry journal article supplement (doi:10.1039/d1gc01442k), 2021-01-01
Supplement: d1gc01442k1.pdf [file d1gc01442k1.pdf]

*Supplementary Information*

**Lignin Valorization for Protocatechuic Acid Production in Engineered**

***Saccharomyces cerevisiae***

Ren-Kuan Zhang<sup>a,b</sup>, Yong-Shui Tan<sup>a,b</sup>, You-Zhi Cui<sup>a,b</sup>, Xin Xin<sup>a,b</sup>, Zhi-Hua Liu<sup>a,b</sup>,

Bing-Zhi Li\*<sup>a,b</sup>, Ying-Jin Yuan<sup>a,b</sup>.

<sup>a</sup>: Frontiers Science Center for Synthetic Biology and Key Laboratory of Systems Bioengineering

(Ministry of Education), School of Chemical Engineering and Technology, Tianjin University,

Tianjin, 300072, PR China

<sup>b</sup>: Synthetic Biology Research Platform, Collaborative Innovation Center of Chemical Science and

Engineering (Tianjin), Tianjin University, Tianjin, 300072, PR China

\*Corresponding author: Prof. Bing-Zhi Li ([bzli@tju.edu.cn](mailto:bzli@tju.edu.cn))

Table S1 Constructed plasmids used in the present study.

| Plasmids                   | Description                                                                                                                                                         | Source     |
|----------------------------|---------------------------------------------------------------------------------------------------------------------------------------------------------------------|------------|
| pRS415                     | pRS415 Single copy plasmid with LEU2 and Amp <sup>R</sup> marker                                                                                                    | This lab   |
| pRS416                     | pRS416 Single copy plasmid with URA3 and Amp <sup>R</sup> marker                                                                                                    | This Lab   |
| pRS413                     | pRS413 Single copy plasmid with HIS3 and Amp <sup>R</sup> marker                                                                                                    | This Lab   |
| pRS415- <i>SsfcS-Ssech</i> | pRS415 $P_{TP11}$ - <i>SsfcS</i> - $T_{GPM1}$ - $P_{FBA1}$ - <i>Ssech</i> - $T_{PG11}$                                                                              | This study |
| pRS415- <i>Ppfcs-Ppech</i> | pRS415 $P_{TP11}$ - <i>Ppfcs</i> - $T_{GPM1}$ - $P_{FBA1}$ - <i>Ppech</i> - $T_{PG11}$                                                                              | This study |
| pRS415- <i>4CL-Ppech</i>   | pRS415 $P_{TP11}$ - <i>4CL</i> - $T_{GPM1}$ - $P_{FBA1}$ - <i>Ppech</i> - $T_{PG11}$                                                                                | This study |
| pRS415- <i>vdh</i>         | pRS415 $P_{TP11}$ - <i>4CL</i> - $T_{GPM1}$ - $P_{FBA1}$ - <i>Ppech</i> - $T_{PG11}$ - $P_{ENO2}$ - <i>vdh</i> - $T_{ENO2}$                                         | This study |
| pRS415- <i>pobA</i>        | pRS415 $P_{TP11}$ - <i>4CL</i> - $T_{GPM1}$ - $P_{FBA1}$ - <i>Ppech</i> - $T_{PG11}$ - $P_{ENO2}$ - <i>vdh</i> - $T_{ENO2}$ - $P_{PGK1}$ - <i>pobA</i> - $T_{HXT7}$ | This study |
| pRS413- <i>pobA</i>        | pRS413 $T_{ENO2}$ - $P_{PGK1}$ - <i>pobA</i> - $T_{HXT7}$                                                                                                           | This study |
| pRS415- <i>PdvanAB</i>     | pRS415 $T_{HXT7}$ - $P_{TEF1}$ - <i>PdvanA</i> - $T_{CYC1}$ - $P_{TDH3}$ - <i>PdvanB</i> - $T_{TDH3}$                                                               | This study |
| pRS415- <i>RjvanAB</i>     | pRS415 $T_{HXT7}$ - $P_{TEF1}$ - <i>RjvanA</i> - $T_{CYC1}$ - $P_{TDH3}$ - <i>RjvanB</i> - $T_{TDH3}$                                                               | This study |
| pRS415- <i>ligM</i>        | pRS415 $T_{HXT7}$ - $P_{TEF1}$ - <i>ligM</i> - $T_{CYC1}$                                                                                                           | This study |
| pRS413- <i>Met6</i>        | pRS413 $T_{PG11}$ - $P_{GPM1}$ - <i>MET6</i> - $T_{TEF1}$                                                                                                           | This study |
| pRS416- <i>Ssmetf1</i>     | pRS416 $T_{TDH3}$ - $P_{ACT1}$ - <i>Ssmetf1</i> - $T_{ADH1}$                                                                                                        | This study |
| pRS416- <i>Rdmetf1</i>     | pRS416 $T_{TDH3}$ - $P_{ACT1}$ - <i>Rdmetf1</i> - $T_{ADH1}$                                                                                                        | This study |

Table S2 Engineered *S. cerevisiae* strains used in the present study.

| <i>S. cerevisiae</i> strains | Description                                                                                                                                                                                                                                                                                                                                                                                                                                                                                      | Source     |
|------------------------------|--------------------------------------------------------------------------------------------------------------------------------------------------------------------------------------------------------------------------------------------------------------------------------------------------------------------------------------------------------------------------------------------------------------------------------------------------------------------------------------------------|------------|
| BY4742                       | MAT $\alpha$ his3 $\Delta$ 1 leu2 $\Delta$ 0 lys2 $\Delta$ 0 ura3 $\Delta$ 0                                                                                                                                                                                                                                                                                                                                                                                                                     | This lab   |
| yZR1                         | BY4742, $\Delta$ ADH6, $\Delta$ ADH7, $\Delta$ BDH2, $\Delta$ FDC                                                                                                                                                                                                                                                                                                                                                                                                                                | This study |
| yZR2                         | BY4742, $\Delta$ ADH6, $\Delta$ ADH7, $\Delta$ BDH2, $\Delta$ FDC, $\Delta$ MHT1                                                                                                                                                                                                                                                                                                                                                                                                                 | This study |
| yZR3                         | BY4742, $\Delta$ ADH6, $\Delta$ ADH7, $\Delta$ BDH2, $\Delta$ FDC, $\Delta$ MHT1, $\Delta$ SAM4                                                                                                                                                                                                                                                                                                                                                                                                  | This study |
| yZR4                         | yZR1, pRS415                                                                                                                                                                                                                                                                                                                                                                                                                                                                                     | This study |
| yPHNA1                       | yZR1, pRS415- <i>Ssfcs-Ssech</i>                                                                                                                                                                                                                                                                                                                                                                                                                                                                 | This study |
| yPHNA2                       | yZR1, pRS415- <i>PpfcS-Ppech</i>                                                                                                                                                                                                                                                                                                                                                                                                                                                                 | This study |
| yPHNA3                       | yZR1, pRS415- <i>4CL-Ppech</i>                                                                                                                                                                                                                                                                                                                                                                                                                                                                   | This study |
| yPHCA1                       | yZR1, pRS415- <i>vdh</i>                                                                                                                                                                                                                                                                                                                                                                                                                                                                         | This study |
| yPCA1                        | yZR1, pRS415- <i>pobA</i> , pRS413                                                                                                                                                                                                                                                                                                                                                                                                                                                               | This study |
| yPCA2                        | yZR1, pRS415- <i>pobA</i> , pRS413- <i>PobA</i>                                                                                                                                                                                                                                                                                                                                                                                                                                                  | This study |
| yPCA3                        | yZR1, pRS415- <i>PpvanAB</i>                                                                                                                                                                                                                                                                                                                                                                                                                                                                     | This study |
| yPCA4                        | yZR1, pRS415- <i>RjvanAB</i>                                                                                                                                                                                                                                                                                                                                                                                                                                                                     | This study |
| yPCA5                        | yZR1, pRS415- <i>ligM</i> , pRS413                                                                                                                                                                                                                                                                                                                                                                                                                                                               | This study |
| yPCA6                        | yZR1, pRS415- <i>ligM</i> , pRS413- <i>MET6</i>                                                                                                                                                                                                                                                                                                                                                                                                                                                  | This study |
| yPCA7                        | yPCA5, $\Delta$ MHT1                                                                                                                                                                                                                                                                                                                                                                                                                                                                             | This study |
| yPCA8                        | yPCA6, $\Delta$ SAM4                                                                                                                                                                                                                                                                                                                                                                                                                                                                             | This study |
| yPCA9                        | yZR3, pRS415- <i>ligM</i> , pRS413- <i>MET6</i> , pRS416- <i>Ssmetf1</i>                                                                                                                                                                                                                                                                                                                                                                                                                         | This study |
| yPCA10                       | yZR3, pRS415- <i>ligM</i> , pRS413- <i>MET6</i> , pRS416- <i>Rdmetf1</i>                                                                                                                                                                                                                                                                                                                                                                                                                         | This study |
| yPCA11                       | yPCA10, <i>HO::P<sub>TPH1</sub>-4CL-T<sub>GPM1</sub>-P<sub>FBA1</sub>-P<sub>pech</sub>-T<sub>PGH1</sub>-P<sub>ENO2</sub>-vdh-T<sub>ENO2</sub>-P<sub>PGK1</sub>-pobA-T<sub>HXT7</sub>-P<sub>TEF1</sub>-P<sub>dvanA</sub>-T<sub>CYC1</sub>-P<sub>TDH3</sub>-P<sub>dvanB</sub>-T<sub>TDH3</sub></i>                                                                                                                                                                                                 | This study |
| yPCA12                       | yZR3, <i>HO::P<sub>TPH1</sub>-4CL-T<sub>GPM1</sub>-P<sub>FBA1</sub>-P<sub>pech</sub>-T<sub>PGH1</sub>-P<sub>ENO2</sub>-vdh-T<sub>ENO2</sub>-P<sub>PGK1</sub>-pobA-T<sub>HXT7</sub>-P<sub>TEF1</sub>-P<sub>dvanA</sub>-T<sub>CYC1</sub>-P<sub>TDH3</sub>-P<sub>dvanB</sub>-T<sub>TDH3</sub>, YPRCdelta15::P<sub>PGK1</sub>-pobA-T<sub>HXT7</sub>-P<sub>TEF1</sub>-<i>ligM</i>-T<sub>CYC1</sub>-P<sub>GPM1</sub>-<i>MET6</i>-T<sub>TEF1</sub>-P<sub>ACT1</sub>-<i>Rdmetf1</i>-T<sub>ADH1</sub></i> | This study |

Table S3 Different concentrations of APL media were used in this study.

| APL Concentration (X)   | 0.2 | 0.5 | 0.8 |
|-------------------------|-----|-----|-----|
| Initial APL (mL)        | 4   | 10  | 16  |
| 10X YPD (mL)            | 2   | 2   | 2   |
| Seed culture (mL)       | ~2  | ~2  | ~2  |
| ddH <sub>2</sub> O (mL) | ~12 | ~6  | ~0  |
| Total volume (mL)       | 20  | 20  | 20  |

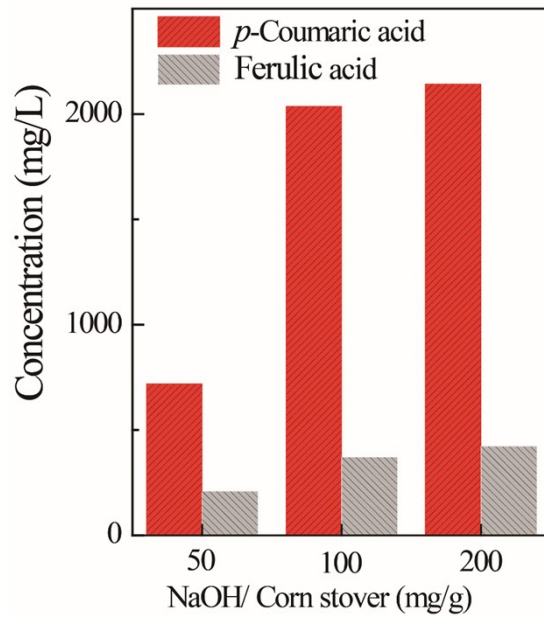

Figure S1 The concentration of *p*-coumaric acid and ferulic acid in alkaline pretreated liquor (APL) produced from different conditions of alkaline pretreatment.
